# Supplementary material for: Multiple technical routes to obtain a proteomics expression profile of French liver samples
Source: Royal Society of Chemistry journal article supplement (doi:10.1039/c3ay42146e), 2014-01-01
Supplement: c3ay42146e1.pdf [file c3ay42146e1.pdf]

### Supplementary Figures

Figure 1. Distributions of all the target and decoy search results from route 1. Various scores are derived from Rank\_All results.

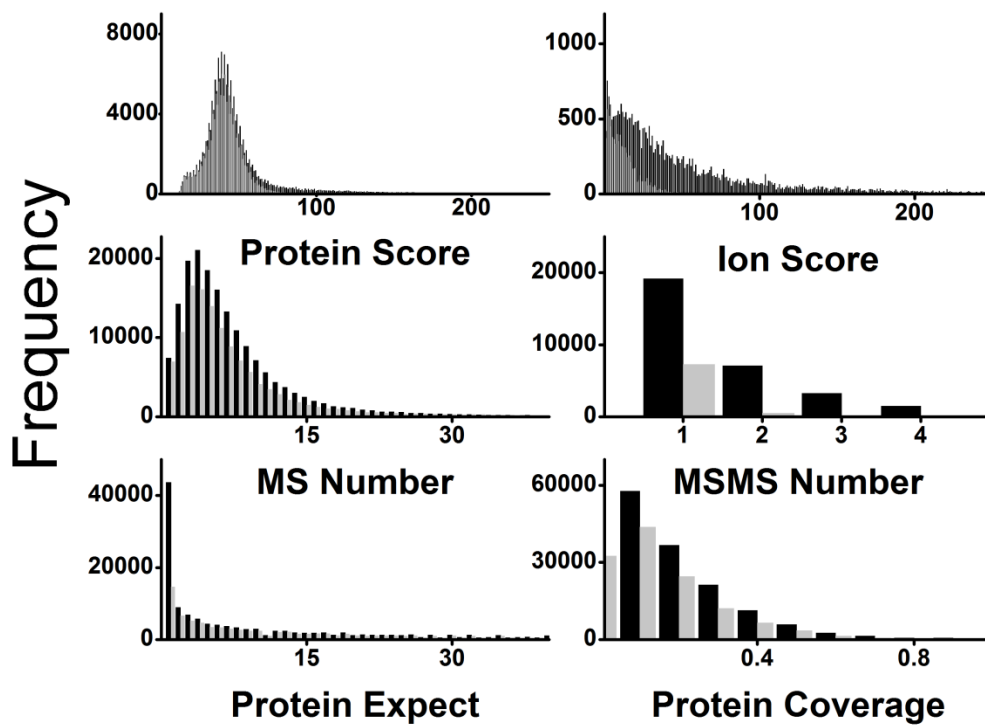

Figure 2. Distributions of all the target and decoy search results from route 1. Various scores are derived from Rank\_1 results. All the spots on the MALDI plate are separated into MSMS supported and MSMS unsupported.

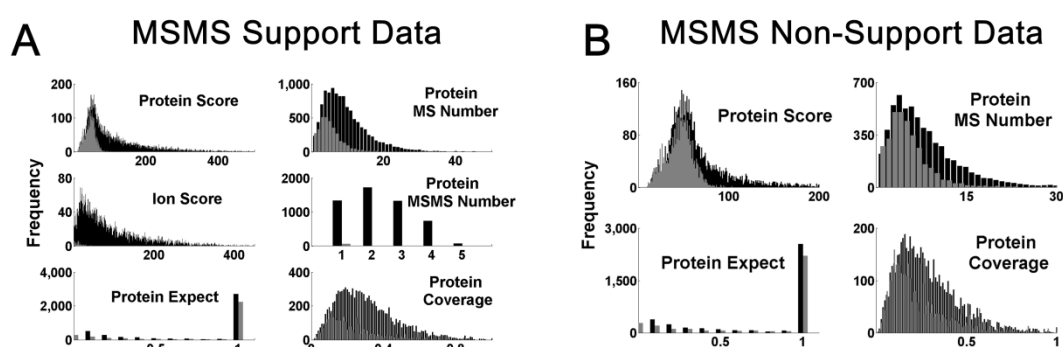

Figure 3. Distributions of all the target and decoy search results from route 2. Various scores are derived from Rank\_All results.

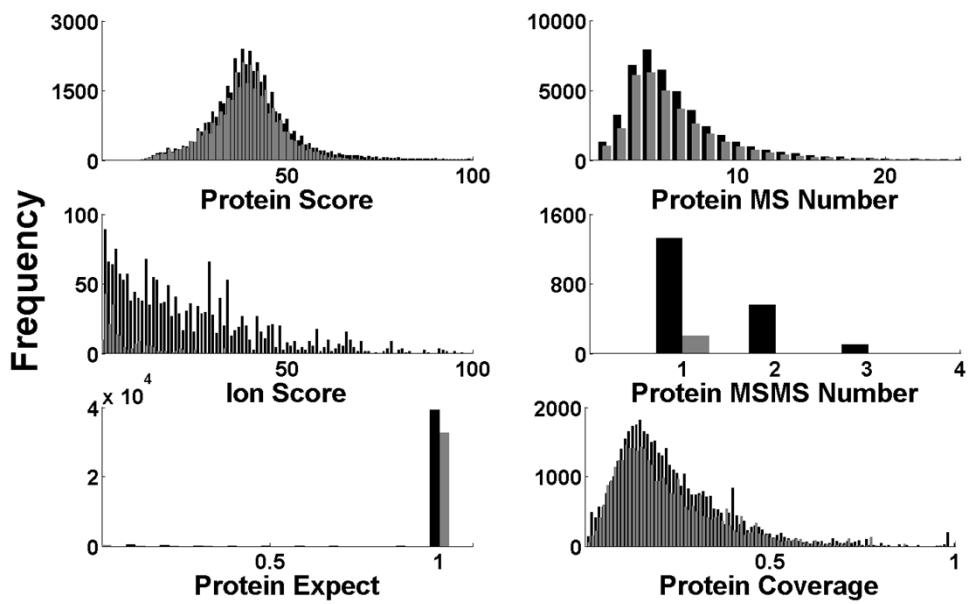

Figure 4. Distributions of all the target and decoy search results from route 2. Various scores are derived from Rank\_1 results. All the spots on the MALDI plate are separated into MSMS supported and MSMS unsupported.

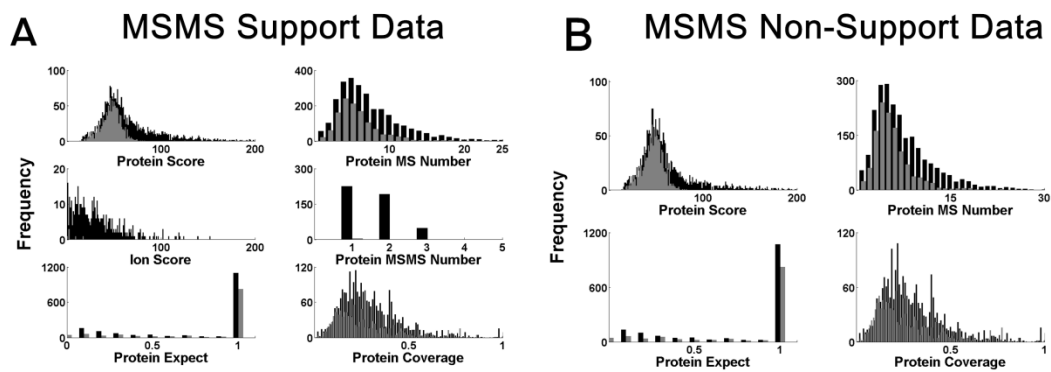

Figure 5. Boxplot of physical and chemical of the identified peptides in each technique route.

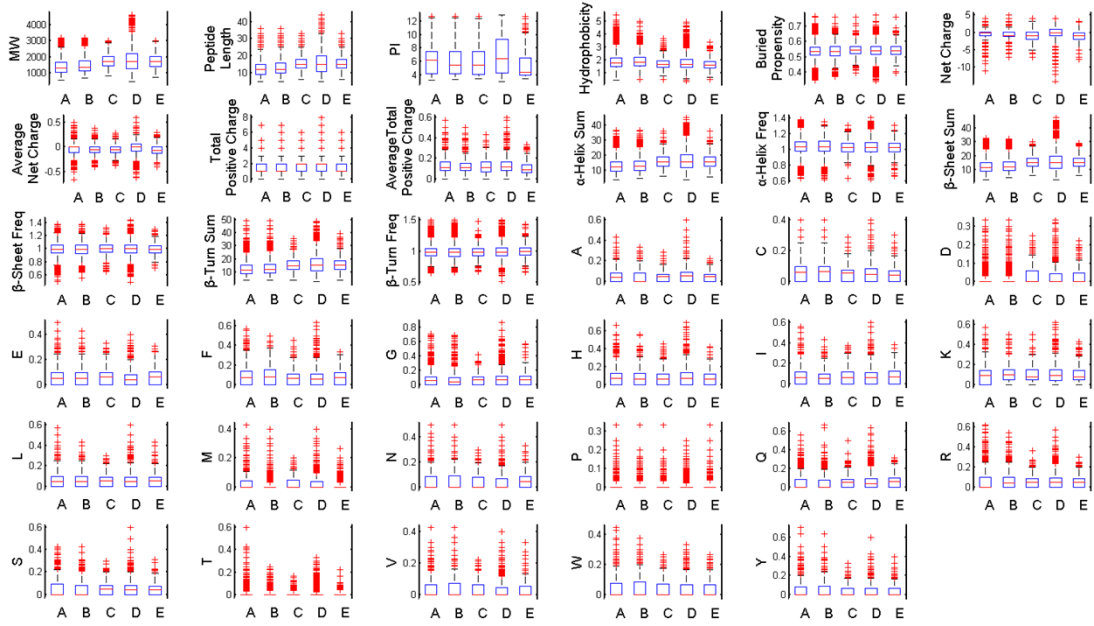

A, B, C, D, E denotes each technique route respectively.
